# Supplementary material for: Learning Strategies for First-Year Biology: Toward Moving the “Murky Middle”
Source: Atypon-hosted journal article supplement (doi:10.1187/cbe.17-10-0211), 2018-08-24
Supplement: combinedsupmats.pdf [file combinedsupmats.pdf]

# Supplemental Material

*CBE—Life Sciences Education*

Kritzinger *et al.*

## Appendix A

### Modified wording of MSLQ to fit South African Context

---

| Question number | Modified wording                                                                                                                                     |
|-----------------|------------------------------------------------------------------------------------------------------------------------------------------------------|
| 32              | When I study for this course I make an outline of the material to help me organise my thoughts.                                                      |
| 33              | During class time I miss important points because I'm thinking of other things. (reverse coded)                                                      |
| 34              | When studying for this course, I try to explain the material to a classmate or friend.                                                               |
| 35              | I study in a place where I can concentrate on my course work.                                                                                        |
| 36              | When studying for this course, I make up questions to help focus my reading.                                                                         |
| 37              | I feel so lazy or bored when I study for this course that I give up before I finish what I planned to do. (reverse coded)                            |
| 38              | I find myself questioning things I hear or read in this course to decide if I find them convincing                                                   |
| 39              | When I study for this course, I practice saying the material to myself a number of times.                                                            |
| 40              | Even if I have trouble understanding the material in this course, I try to do the work on my own, without help from anyone. (reverse coded)          |
| 41              | When I become confused about something I'm reading for this course, I go back and try to figure it out                                               |
| 42              | When I study for this course, I go through the content material and try to find the most important ideas                                             |
| 43              | I make good use of my study time for this course.                                                                                                    |
| 44              | If course content is difficult to understand, I change the way I study the material.                                                                 |
| 45              | I try to work with other students from this course to complete the course assignments.                                                               |
| 46              | When studying for this course, I work through my class notes and the course materials a number of times                                              |
| 47              | When a theory, interpretation, or conclusion is presented in course or in the course materials, I try to decide if there is good supporting evidence |
| 48              | I work hard to do well in this course even if I don't like what we are doing.                                                                        |
| 49              | I make simple charts, diagrams, or tables to help me organise course material.                                                                       |
| 50              | When studying for this course, I set aside time to discuss course material with other students from the class.                                       |
| 51              | I treat the course material as a starting point and try to develop my own ideas about it.                                                            |
| 52              | I find it hard to stick to a study schedule. (reverse coded)                                                                                         |
| 53              | When I study for this course, I make use of information from different sources, such as lectures, course material, and discussions.                  |
| 54              | Before I study new course material thoroughly, I page through it to see how it is organised.                                                         |
| 55              | I ask myself questions to make sure I understand the material I have been studying in this course.                                                   |
| 56              | I try to change the way I study in order to fit the course requirements.                                                                             |
| 57              | I find that I study for this course but don't know what it is all about (reverse coded)                                                              |
| 58              | I ask the lecturer and tutor to clarify concepts I don't understand well.                                                                            |
| 59              | I memorise key words to remind myself of important concepts in this course.                                                                          |

---

---

|    |                                                                                                                                        |
|----|----------------------------------------------------------------------------------------------------------------------------------------|
| 60 | When course work is difficult, I either give up or only study the easy parts. (reverse coded)                                          |
| 61 | I determine what I am supposed to learn from the material before I start studying                                                      |
| 62 | I try to relate ideas in this subject to those in other courses whenever possible.                                                     |
| 63 | When I study for this course, I go over my class notes and make an outline of important concepts                                       |
| 64 | When studying for this course, I try to relate the material to what I already know.                                                    |
| 65 | I have a regular place set aside for studying                                                                                          |
| 66 | I try to play around with ideas of my own related to what I am learning in this course.                                                |
| 67 | When I study for this course, I write brief summaries of the main ideas from the textbook and my class notes                           |
| 68 | When I can't understand the material in this course, I ask a tutor in this course for help.                                            |
| 69 | I try to understand the material in this course by making connections between the course materials and the concepts from the lectures. |
| 70 | I make sure that I keep up with the assigned work for this course.                                                                     |
| 71 | Whenever I find a claim or conclusion in this course, I think about possible alternatives                                              |
| 72 | I make lists of important items for this course and memorize the lists.                                                                |
| 73 | I attend all classes for this course                                                                                                   |
| 74 | Even when course materials are boring and uninteresting, I manage to keep working until I finish.                                      |
| 75 | I try to identify students in this course whom I can ask for help if necessary.                                                        |
| 76 | When studying for this course I try to determine which concepts I don't understand well.                                               |
| 77 | I find that I don't spend much time on this course because of other activities.(reverse coded)                                         |
| 78 | When I study for this course, I set goals for myself in order to direct my activities in each study session.                           |
| 79 | If I get confused taking notes in this course, I make sure I sort it out afterwards.                                                   |
| 80 | I rarely find time to review my notes or course material before a test. (reverse coded)                                                |
| 81 | I try to apply ideas from course material in other course activities such as lectures and discussions                                  |

---

Appendix B

Summary of subscale ANOVA analysis with mean and standard deviation.

| Scale                                               | Group | Mean | Standard Deviation | Significance of ANOVA | Tukey <i>post hoc</i><br>(Group 1 & 2) | Tukey <i>post hoc</i><br>(Group 2& 3) |
|-----------------------------------------------------|-------|------|--------------------|-----------------------|----------------------------------------|---------------------------------------|
| <b>Rehearsal<br/>(4 items)</b>                      | 1     | 7.1  | 2.59               | 0.005                 | 0.037                                  | 0.840                                 |
|                                                     | 2     | 7.8  | 2.38               |                       |                                        |                                       |
|                                                     | 3     | 7.9  | 2.39               |                       |                                        |                                       |
| <b>Organisation<br/>(4 items)</b>                   | 1     | 7.7  | 1.91               | 0.053                 | 0.425                                  | 0.494                                 |
|                                                     | 2     | 7.9  | 1.93               |                       |                                        |                                       |
|                                                     | 3     | 8.2  | 1.87               |                       |                                        |                                       |
| <b>Metacognitive self-regulation<br/>(12 items)</b> | 1     | 24.9 | 4.22               | 0.002                 | 0.165                                  | 0.216                                 |
|                                                     | 2     | 25.7 | 4.00               |                       |                                        |                                       |
|                                                     | 3     | 26.5 | 3.82               |                       |                                        |                                       |
| <b>Elaboration<br/>(6 items)</b>                    | 1     | 12.7 | 3.17               | 0.013                 | 0.880                                  | 0.065                                 |
|                                                     | 2     | 12.9 | 3.19               |                       |                                        |                                       |
|                                                     | 3     | 13.7 | 2.98               |                       |                                        |                                       |
| <b>Critical thinking<br/>(5 items)</b>              | 1     | 8.9  | 2.75               | 0.021                 | 0.314                                  | 0.399                                 |
|                                                     | 2     | 9.3  | 2.78               |                       |                                        |                                       |
|                                                     | 3     | 9.7  | 2.70               |                       |                                        |                                       |
| <b>Time and study environment<br/>(8 items)</b>     | 1     | 21.1 | 3.56               | 0.013                 | 0.463                                  | 0.207                                 |
|                                                     | 2     | 21.6 | 3.77               |                       |                                        |                                       |
|                                                     | 3     | 22.3 | 3.33               |                       |                                        |                                       |
| <b>Effort regulation<br/>(4 items)</b>              | 1     | 10.4 | 1.99               | 0.000                 | 0.145                                  | <b>0.010</b>                          |
|                                                     | 2     | 10.8 | 2.20               |                       |                                        |                                       |
|                                                     | 3     | 11.5 | 1.89               |                       |                                        |                                       |
| <b>Peer learning<br/>(3 items)</b>                  | 1     | 6.3  | 1.85               | 0.015                 | 0.311                                  | 0.350                                 |
|                                                     | 2     | 6.6  | 1.67               |                       |                                        |                                       |
|                                                     | 3     | 6.8  | 1.64               |                       |                                        |                                       |
